# Supplementary material
Source: PubMed Central journal article supplement (PMC3686489)
Supplement: NIHMS472218-supplement-supplement_1.pdf [file NIHMS472218-supplement-supplement_1.pdf]

**Online supplemental\_Table S1. Characteristics and quality criteria for tagging SNPs in/around the *CNR1* gene<sup>a</sup>.**

| SNP               | SNP position | Callrate | HWE <i>P</i> | Allele 1 (%) | Allele 2 (%) | Genotype 1 | Genotype 2 | Genotype 3 | Genotype 1<br>count (%) | Genotype 2<br>count (%) | Genotype 3<br>count (%) |
|-------------------|--------------|----------|--------------|--------------|--------------|------------|------------|------------|-------------------------|-------------------------|-------------------------|
| <b>rs10485171</b> | 88900109     | 0.97     | 0.559        | T (56.7)     | C (43.3)     | C/C        | T/C        | T/T        | 529 (19.5)              | 1306 (48.2)             | 872 (32.2)              |
| <b>rs806365</b>   | 88902668     | 0.99     | 1.000        | C (57.4)     | T (42.6)     | C/C        | C/T        | T/T        | 896 (32.3)              | 1335 (48.2)             | 537 (19.4)              |
| <b>rs7766029</b>  | 88904154     | 0.99     | 0.143        | C (52.9)     | T (47.1)     | C/C        | C/T        | T/T        | 758 (27.5)              | 1378 (50)               | 617 (22.4)              |
| <b>rs806366</b>   | 88904308     | 0.98     | 0.876        | C (50.0)     | T (50.0)     | C/C        | C/T        | T/T        | 742 (27.0)              | 1375 (50.1)             | 623 (22.7)              |
| <b>rs806368</b>   | 88906819     | 0.99     | 0.350        | T (76.4)     | C (23.6)     | C/C        | T/C        | T/T        | 136 (4.8)               | 953 (34.3)              | 1688 (60.7)             |
| <b>rs12720071</b> | 88907900     | 0.94     | 0.327        | A (89.3)     | G (10.7)     | A/A        | A/G        | G/G        | 2136 (81.2)             | 472 (17.9)              | 21 (0.01)               |
| <b>rs1049353</b>  | 88910354     | 0.98     | 0.269        | G (74.8)     | A (25.2)     | A/A        | G/A        | G/G        | 172 (6.2)               | 1021 (37.1)             | 1556 (56.6)             |
| <b>rs806369</b>   | 88912897     | 0.99     | 0.899        | C (71.0)     | T (29.0)     | C/C        | C/T        | T/T        | 1400 (50.5)             | 1108 (40)               | 261 (9.4)               |
| <b>rs806371</b>   | 88913082     | 1.00     | 0.750        | T (85.8)     | G (14.2)     | G/G        | T/G        | T/T        | 48 (1.7)                | 646 (23.1)              | 2095 (75.1)             |
| <b>rs806374</b>   | 88914039     | 0.99     | 0.575        | T (63.7)     | C (36.3)     | C/C        | T/C        | T/T        | 347 (12.4)              | 1236 (44.5)             | 1194 (43)               |
| <b>rs806375</b>   | 88915240     | 0.99     | 0.750        | A (57.0)     | T (43.0)     | A/A        | A/T        | T/T        | 882 (31.9)              | 1345 (48.6)             | 535 (19.3)              |
| <b>rs806376</b>   | 88915367     | 0.98     | 0.601        | T (51.7)     | C (48.3)     | C/C        | T/C        | T/T        | 653 (23.8)              | 1386 (50.5)             | 703 (25.6)              |
| <b>*rs6928813</b> | 88918417     | 0.96     | 0.000        | A (83.8)     | G (16.2)     | A/A        | A/G        | G/G        | 1948 (72.4)             | 623 (23.1)              | 118 (4.3)               |
| <b>rs806380</b>   | 88921372     | 0.98     | 0.954        | A (65.4)     | G (34.6)     | A/A        | A/G        | G/G        | 1143 (41.6)             | 1235 (45)               | 364 (13.2)              |
| <b>rs7752758</b>  | 88923095     | 0.99     | 0.128        | A (89.5)     | G (10.5)     | A/A        | A/G        | G/G        | 2221 (80.0)             | 517 (18.6)              | 37 (1.3)                |
| <b>rs12528858</b> | 88924207     | 0.98     | 0.807        | A (94.3)     | G (5.7)      | A/A        | A/G        | G/G        | 2434 (88.9)             | 291 (10.6)              | 11 (0.01)               |
| <b>rs12205430</b> | 88924644     | 0.95     | 0.131        | T (79.0)     | C (21.0)     | C/C        | T/C        | T/T        | 143 (5.4)               | 854 (32.2)              | 1651 (62.3)             |

|                  |          |      |       |          |          |     |     |     |             |             |             |
|------------------|----------|------|-------|----------|----------|-----|-----|-----|-------------|-------------|-------------|
| <b>rs6454673</b> | 88927768 | 0.99 | 0.319 | G (70.4) | A (29.6) | A/A | G/A | G/G | 280 (10.0)  | 1158 (41.6) | 1339 (48.2) |
| <b>rs6914429</b> | 88928435 | 0.97 | 0.027 | A (88.6) | C (11.4) | A/A | A/C | C/C | 2192 (80.5) | 482 (17.7)  | 47 (1.7)    |

<sup>a</sup>Abbreviations: SNP = single nucleotide polymorphism. HWE  $P = P$  value for departure of Hardy–Weinberg equilibrium.

SNP rs6928813 was not included in the statistical analysis, as its observed genotype frequencies deviated from Hardy–Weinberg equilibrium (HWE) ( $P < 0.001$ ).

All minor allele frequencies (MAF) are  $> 5\%$  (percentage in the allele 2 column).

**Online supplemental Table S2. Association of tagging SNPs in/around the *CNR1* gene with glucose-related traits at exam 7<sup>a</sup>.**

| SNP        | SNP position | Risk allele (% frequency) / other (%) | Trait           | $\beta$ estimate (standard error) | Nominal <i>P</i> value | Empirical <i>P</i> value |
|------------|--------------|---------------------------------------|-----------------|-----------------------------------|------------------------|--------------------------|
| rs10485171 | 88900109     | C (43.3) / T (56.7)                   | Fasting glucose | 0.01 (0.0054)                     | 0.066                  | 0.55                     |
| rs806365   | 88902668     | C (57.4) / T (42.6)                   | Fasting glucose | 0.014 (0.0054)                    | 0.0084                 | 0.11                     |
| rs7766029  | 88904154     | C (52.9) / T (47.1)                   | Fasting glucose | 0.0053 (0.0054)                   | 0.32                   | 0.98                     |
| rs806366   | 88904308     | T (50.0) / C (50.0)                   | Fasting glucose | 0.0031 (0.0053)                   | 0.56                   | 1                        |
| rs806368   | 88906819     | C (23.6) / T (76.4)                   | Fasting glucose | 0.0049 (0.0064)                   | 0.44                   | 1                        |
| rs12720071 | 88907900     | A (89.3) / G (10.7)                   | Fasting glucose | 0.0023 (0.0094)                   | 0.8                    | 1                        |
| rs1049353  | 88910354     | A (25.2) / G (74.8)                   | Fasting glucose | 0.00083 (0.0061)                  | 0.89                   | 1                        |
| rs806369   | 88912897     | C (71.0) / T (29.0)                   | Fasting glucose | 0.013 (0.0058)                    | 0.028                  | 0.3                      |
| rs806371   | 88913082     | G (14.2) / T (85.8)                   | Fasting glucose | 0.0091 (0.0077)                   | 0.23                   | 0.95                     |
| rs806374   | 88914039     | T (63.7) / C (36.3)                   | Fasting glucose | 0.0038 (0.0055)                   | 0.49                   | 1                        |
| rs806375   | 88915240     | T (43.0) / A (57.0)                   | Fasting glucose | 0.01 (0.0053)                     | 0.057                  | 0.5                      |
| rs806376   | 88915367     | C (48.3) / T (51.7)                   | Fasting glucose | 0.0071 (0.0054)                   | 0.19                   | 0.91                     |
| rs806380   | 88921372     | G (34.6) / A (65.4)                   | Fasting glucose | 0.0051 (0.0055)                   | 0.36                   | 0.99                     |
| rs7752758  | 88923095     | G (10.5) / A (89.5)                   | Fasting glucose | 0.0057 (0.0085)                   | 0.5                    | 1                        |
| rs12528858 | 88924207     | A (94.3) / G (5.7)                    | Fasting glucose | 0.0054 (0.011)                    | 0.63                   | 1                        |
| rs12205430 | 88924644     | C (21.0) / T (79.0)                   | Fasting glucose | 0.0039 (0.0065)                   | 0.55                   | 1                        |
| rs6454673  | 88927768     | A (29.6) / G (70.4)                   | Fasting glucose | 0.0051 (0.0057)                   | 0.37                   | 0.99                     |

|            |          |                     |                 |                  |      |      |
|------------|----------|---------------------|-----------------|------------------|------|------|
| rs6914429  | 88928435 | C (11.4) / A (88.6) | Fasting glucose | 0.0068 (0.0085)  | 0.42 | 1    |
| rs10485171 | 88900109 | C (43.3) / T (56.7) | HbA1C           | 0.0014 (0.0044)  | 0.74 | 1    |
| rs806365   | 88902668 | C (57.4) / T (42.6) | HbA1C           | 0.0041 (0.0043)  | 0.35 | 0.99 |
| rs7766029  | 88904154 | C (52.9) / T (47.1) | HbA1C           | 0.0031 (0.0044)  | 0.47 | 1    |
| rs806366   | 88904308 | T (50.0) / C (50.0) | HbA1C           | 0.0028 (0.0043)  | 0.51 | 1    |
| rs806368   | 88906819 | C (23.6) / T (76.4) | HbA1C           | 0.0083 (0.0052)  | 0.11 | 0.72 |
| rs12720071 | 88907900 | G (10.7) / A (89.3) | HbA1C           | 0.0057 (0.0076)  | 0.45 | 1    |
| rs1049353  | 88910354 | G (74.8) / A (25.2) | HbA1C           | 0.0055 (0.0049)  | 0.27 | 0.97 |
| rs806369   | 88912897 | C (71.0) / T (29.0) | HbA1C           | 0.0066 (0.0047)  | 0.16 | 0.87 |
| rs806371   | 88913082 | G (14.2) / T (85.8) | HbA1C           | 0.0064 (0.0063)  | 0.31 | 0.98 |
| rs806374   | 88914039 | C (36.3) / T (63.7) | HbA1C           | 0.0044 (0.0044)  | 0.32 | 0.98 |
| rs806375   | 88915240 | T (43.0) / A (57.0) | HbA1C           | 0.0048 (0.0043)  | 0.27 | 0.97 |
| rs806376   | 88915367 | C (48.3) / T (51.7) | HbA1C           | 0.0045 (0.0044)  | 0.3  | 0.98 |
| rs806380   | 88921372 | A (65.4) / G (34.6) | HbA1C           | 0.0041 (0.0045)  | 0.36 | 0.99 |
| rs7752758  | 88923095 | G (10.5) / A (89.5) | HbA1C           | 0.00043 (0.0068) | 0.95 | 1    |
| rs12528858 | 88924207 | A (94.3) / G (5.7)  | HbA1C           | 0.011 (0.0091)   | 0.24 | 0.95 |
| rs12205430 | 88924644 | C (21.0) / T (79.0) | HbA1C           | 0.00095 (0.0052) | 0.86 | 1    |
| rs6454673  | 88927768 | A (29.6) / G (70.4) | HbA1C           | 0.00038 (0.0046) | 0.93 | 1    |
| rs6914429  | 88928435 | C (11.4) / A (88.6) | HbA1C           | 0.01 (0.0067)    | 0.13 | 0.82 |

<sup>a</sup>Abbreviations: SNP = single nucleotide polymorphism. HbA1C: Hemoglobin A1C at exam 7. Results are derived from age-, sex-, BMI-adjusted models.

The  $\beta$  estimates reflect the additive effect of the risk allele on the log-transformed outcome. Nominal and empirical  $P$  values: To determine the distribution of the minimum  $P$  value across all SNPs under the null hypothesis of no association, we simulated 1,000 traits for our sample, as an approach to correct for the multiple SNPs tested. The empirical  $P$  values correspond to the proportion of simulated minimum  $P$  values smaller or equal to the observed nominal  $P$  values in our data. An empirical value  $<0.05$  denotes statistical significance.

SNP rs6928813 was not included in the statistical analysis, as its observed genotype frequencies deviated from Hardy–Weinberg equilibrium (HWE) ( $P < 0.001$ ).

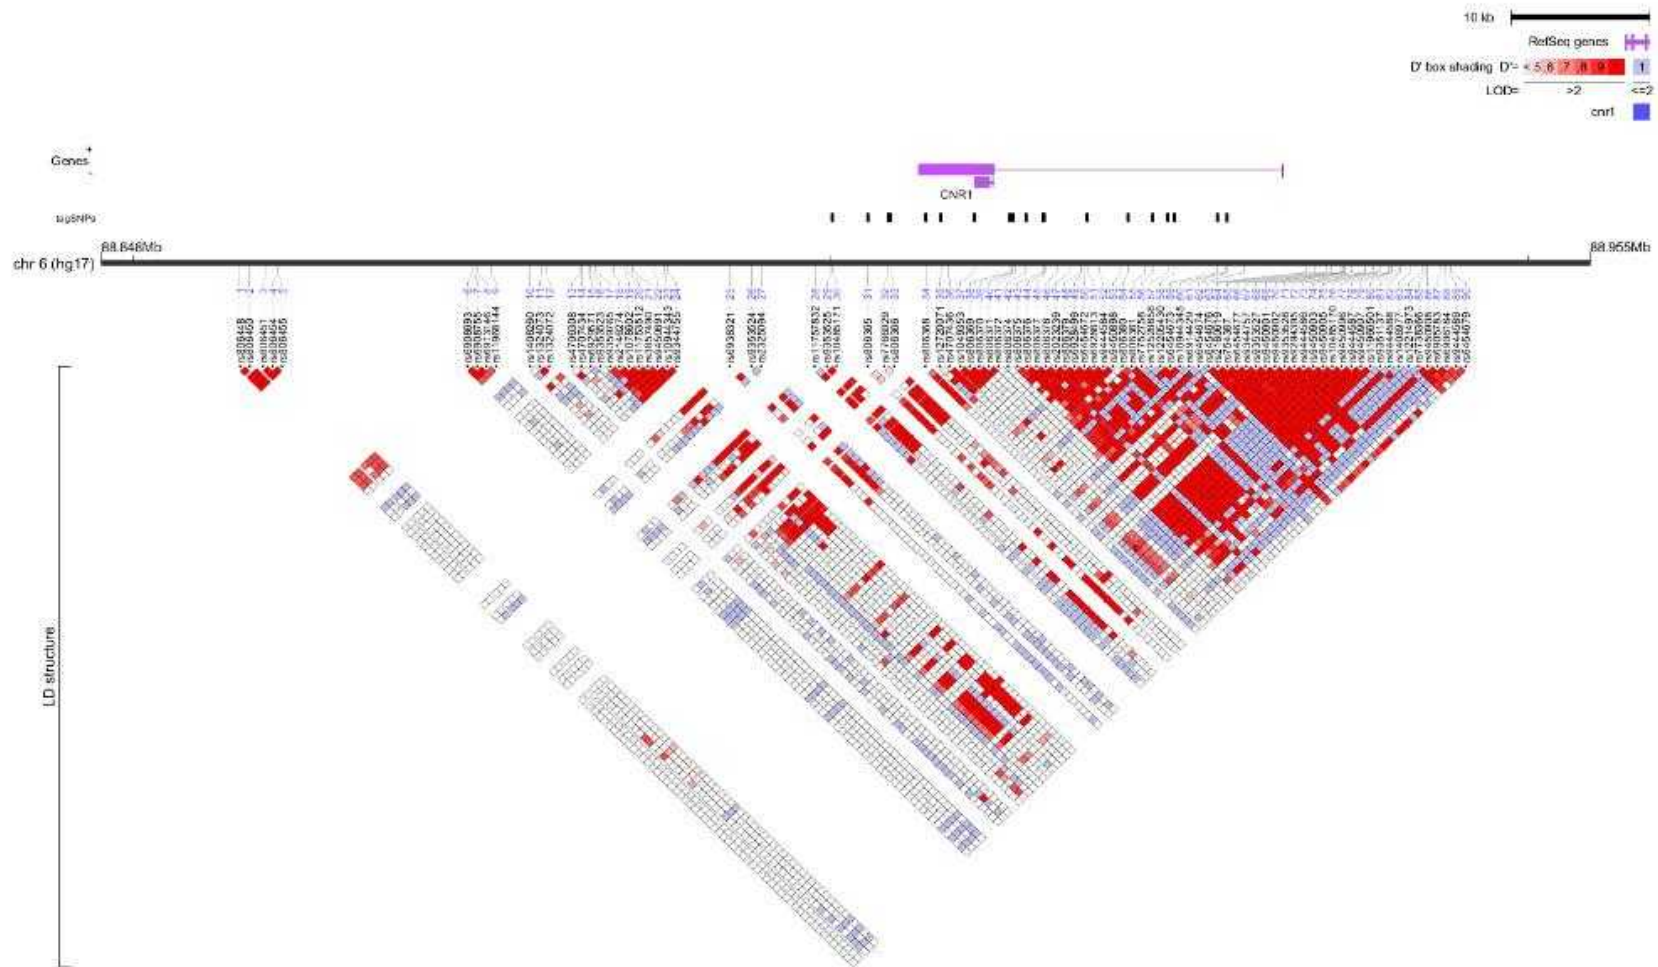

Online supplemental FIGURE S1
